# Supplementary material for: Aptamer-Functionalized Gold Nanoparticles for Drug Delivery to Gynecological Carcinoma Cells
Source: MDPI journal article supplement (doi:10.3390/cancers13164038), 2021-08-11
Supplement: s1 [file s1]

*Supplementary Materials*

# Aptamer-Functionalized Gold Nanoparticles for Drug Delivery to Gynecological Carcinoma Cells

Jessica Lopes-Nunes <sup>1</sup>, Ana S. Agonia <sup>2</sup>, Tiago Rosado <sup>1,3</sup>, Eugénia Gallardo <sup>1</sup>, Rita Palmeira-de-Oliveira <sup>1,2,4</sup>, Ana Palmeira-de-Oliveira <sup>1,2</sup>, José Martinez-de-Oliveira <sup>1</sup>, José Fonseca-Moutinho <sup>1,5</sup>, Maria Paula Cabral Campello <sup>6,7</sup>, Artur Paiva <sup>8,9,10</sup>, António Paulo <sup>6,7</sup>, Alexa Vulgamott <sup>11</sup>, Andrew D. Ellington <sup>11</sup>, Paula A. Oliveira <sup>12</sup>, Carla Cruz <sup>1,\*</sup>

<sup>1</sup> CICS-UBI Centro de Investigação em Ciências da Saúde, Universidade da Beira Interior, Av. Infante D. Henrique, 6200-506 Covilhã, Portugal

<sup>2</sup> Labfit - HPRD Health Products Research and Development, Lda, Edifício UBIMEDICAL Estrada Municipal 506, 6200-284 Covilhã, Portugal

<sup>3</sup> C4 - Cloud Computing Competence Centre, UBIMedical, Universidade da Beira Interior, EM506, 6200-284, Covilhã, Portugal

<sup>4</sup> Center for Neuroscience and Cell Biology, University of Coimbra, Universidade de Coimbra, Rua Larga, 3004-504 Coimbra, Portugal

<sup>5</sup> Centro Hospitalar Universitário Cova da Beira, Covilhã, Portugal

<sup>6</sup> Centro de Ciências e Tecnologias Nucleares, Instituto Superior Técnico, Universidade de Lisboa, Estrada Nacional 10 (km 139,7), 2695-066 Bobadela LRS, Portugal

<sup>7</sup> DECN -Departamento de Engenharia e Ciências Nucleares, Instituto Superior Técnico, Universidade de Lisboa, Portugal

<sup>8</sup> Unidade de Gestão Operacional em Citometria, Centro Hospitalar e Universitário de Coimbra (CHUC), Coimbra, Portugal

<sup>9</sup> CIMAGO/iCBR/CIBB, Faculdade de Medicina da Universidade de Coimbra, Coimbra, Portugal

<sup>10</sup> Instituto Politécnico de Coimbra, ESTESC-Coimbra Health School, Ciências Biomédicas Laboratoriais, Coimbra, Portugal

<sup>11</sup> Department of Molecular Biosciences, The University of Texas at Austin, Austin, TX 78712, USA

<sup>12</sup> Centre for Research and Technology of Agro Environmental and Biological Sciences (CITAB), Inov4Agro, University of Trás os Montes and Alto Douro (UTAD), Quinta de Prados, 5000 801 Vila Real, Portugal

\* Correspondence: Carla Cruz (carlacruz@fcsaude.ubi.pt). Tel: +351275329097; Fax: +351275329099.

## Index

|           |    |
|-----------|----|
| Figure S1 | 3  |
| Figure S2 | 4  |
| Figure S3 | 5  |
| Figure S4 | 5  |
| Figure S5 | 6  |
| Figure S6 | 7  |
| Figure S7 | 8  |
| Figure S8 | 9  |
| Figure S9 | 10 |

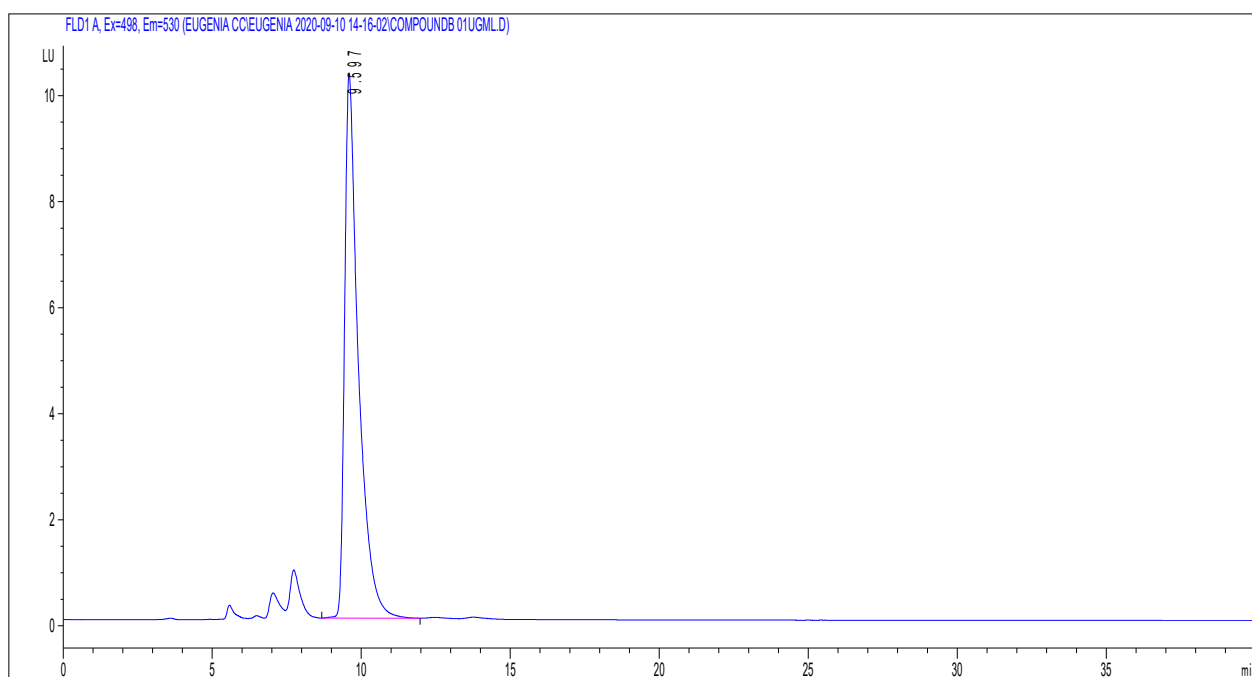

**Figure S1.** Chromatogram of Cs at 100 ng/mL.

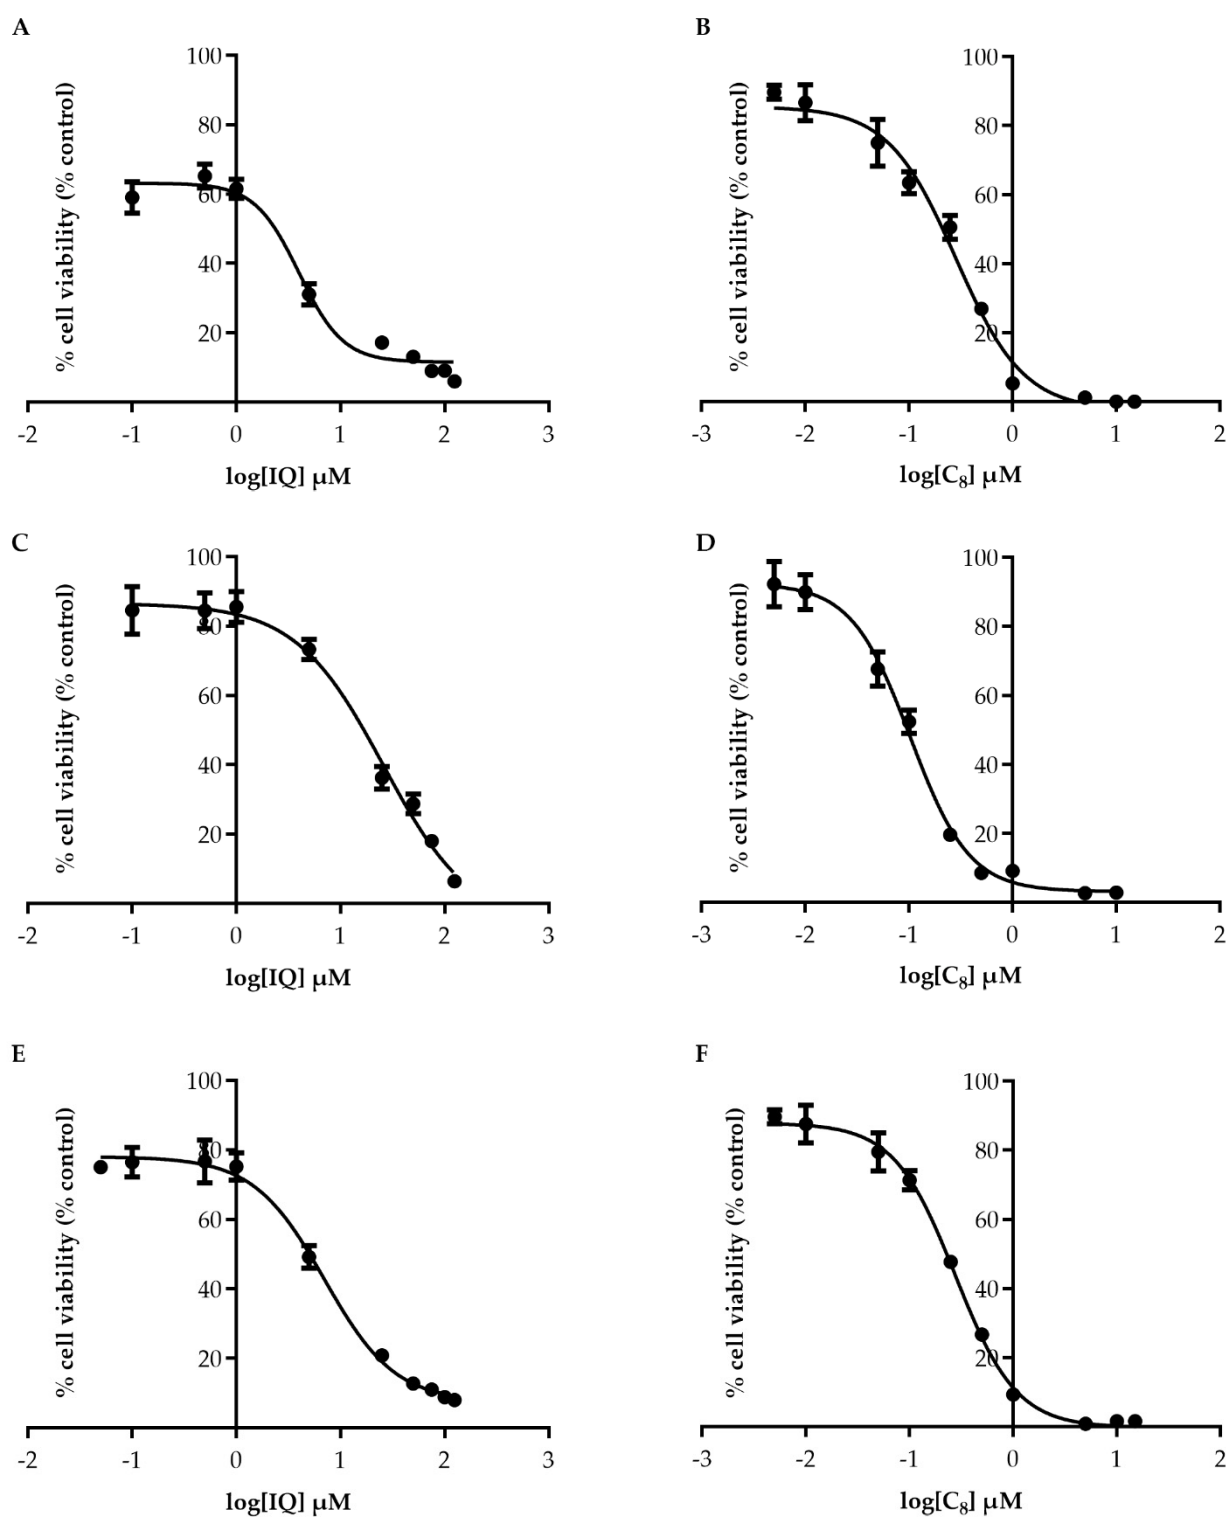

**Figure S2.** Dose-response data of cell viability measured by MTT assay after incubation of Imiquimod or C<sub>8</sub>; (A) HeLa, (C) HEC-1-A and (E) NHDF cells treated with Imiquimod (B) HeLa, (D) HEC-1-A and (F) NHDF cells treated with C<sub>8</sub> for 3 days.

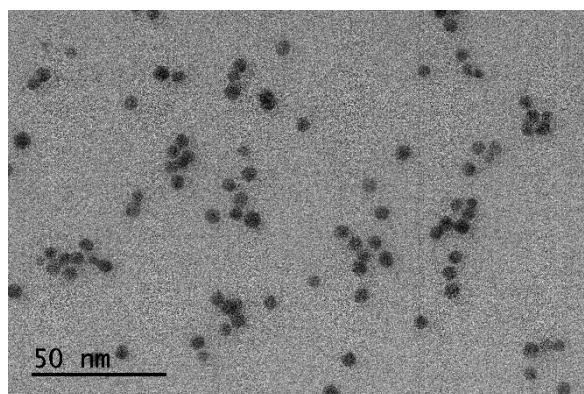

**Figure S3.** TEM image of citrate gold nanoparticles.

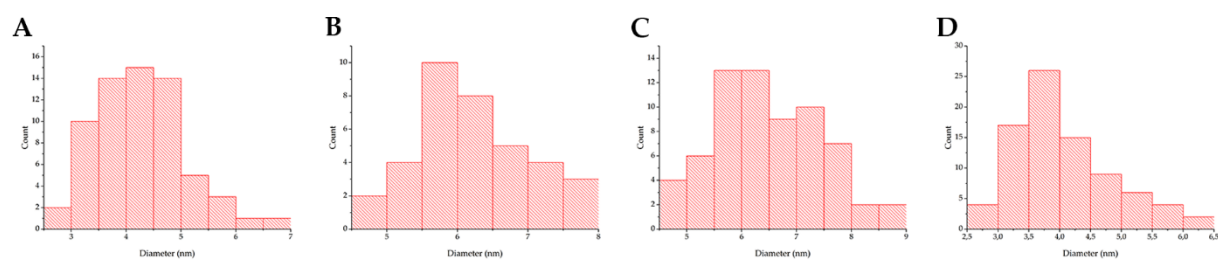

**Figure S4.** Histograms of the nanoparticles size determined in TEM images of (A) citrate gold nanoparticles, (B) AS141-AuNPs, (C) AS1411-AuNPs with IQ and (D) AS1411-AuNPs with C<sub>8</sub>.

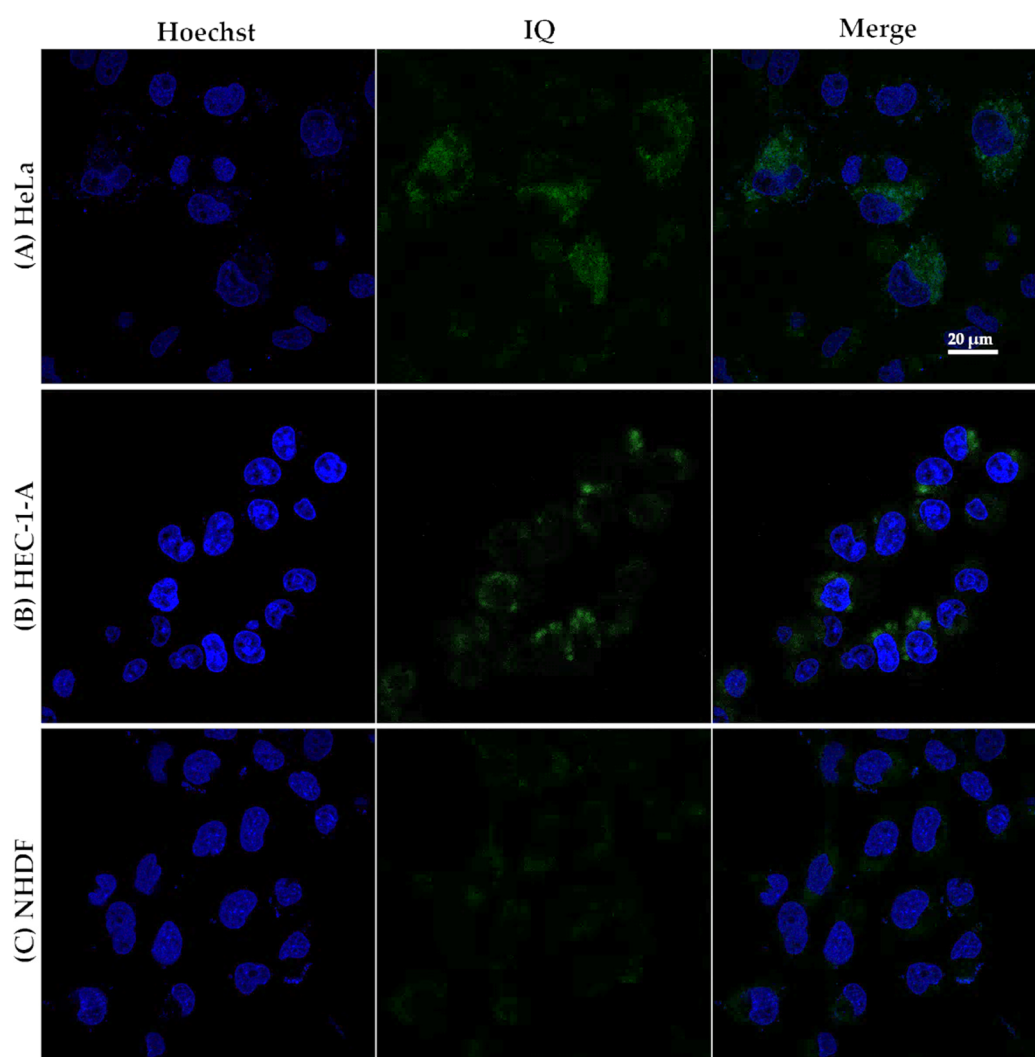

**Figure S5.** Confocal fluorescence images after IQ incubation; (A) HeLa, (B) HEC-1-A and (C) NHDF cell lines incubated with IQ (green) for 24 h at 37 °C. Cell nuclei are stained with Hoechst 33342 (blue). Scale bar: 20 μm.

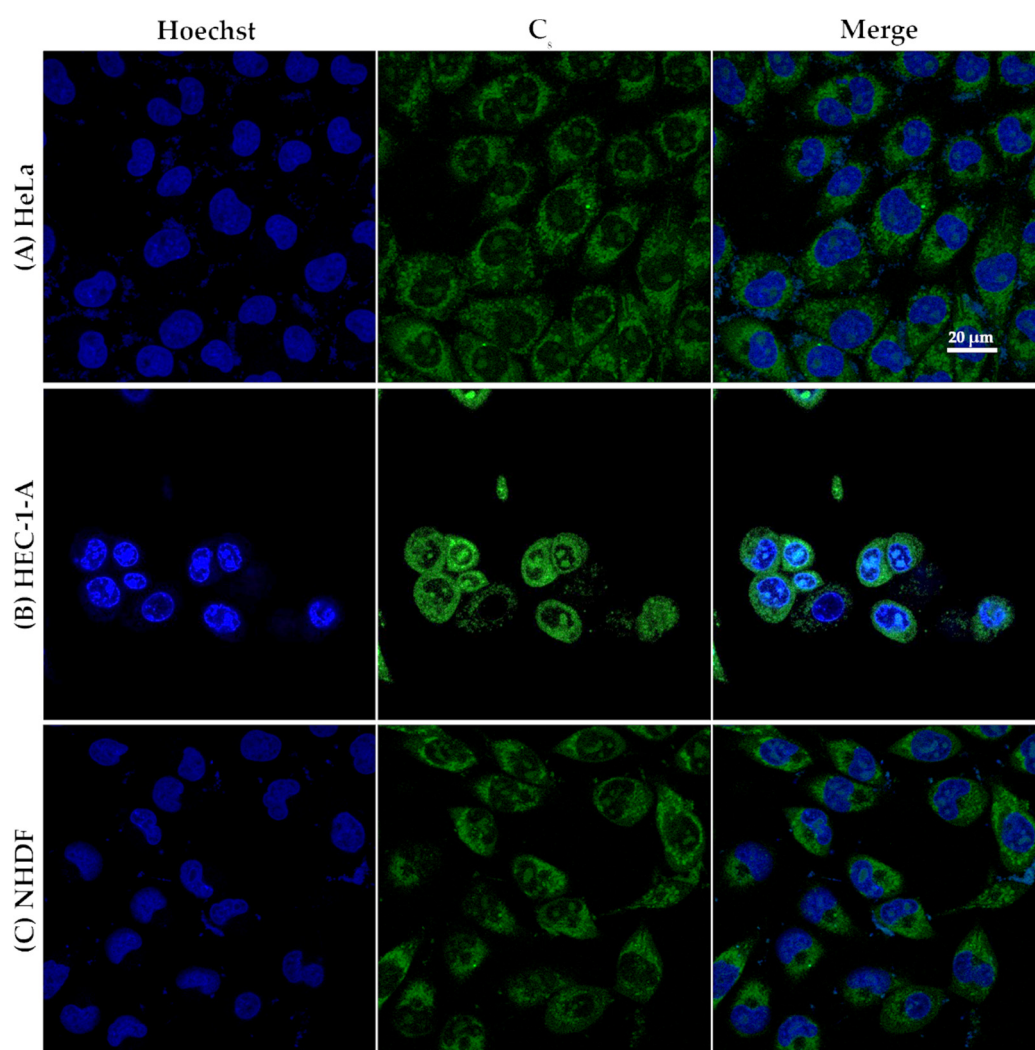

**Figure S6.** Confocal fluorescence images after C<sub>8</sub> incubation; (A) HeLa, (B) HEC-1-A and (C) NHDF cell lines incubated with C<sub>8</sub> (green) for 24 h at 37 °C. Cell nuclei are stained with Hoechst 33342 (blue). Scale bar: 20 μm.

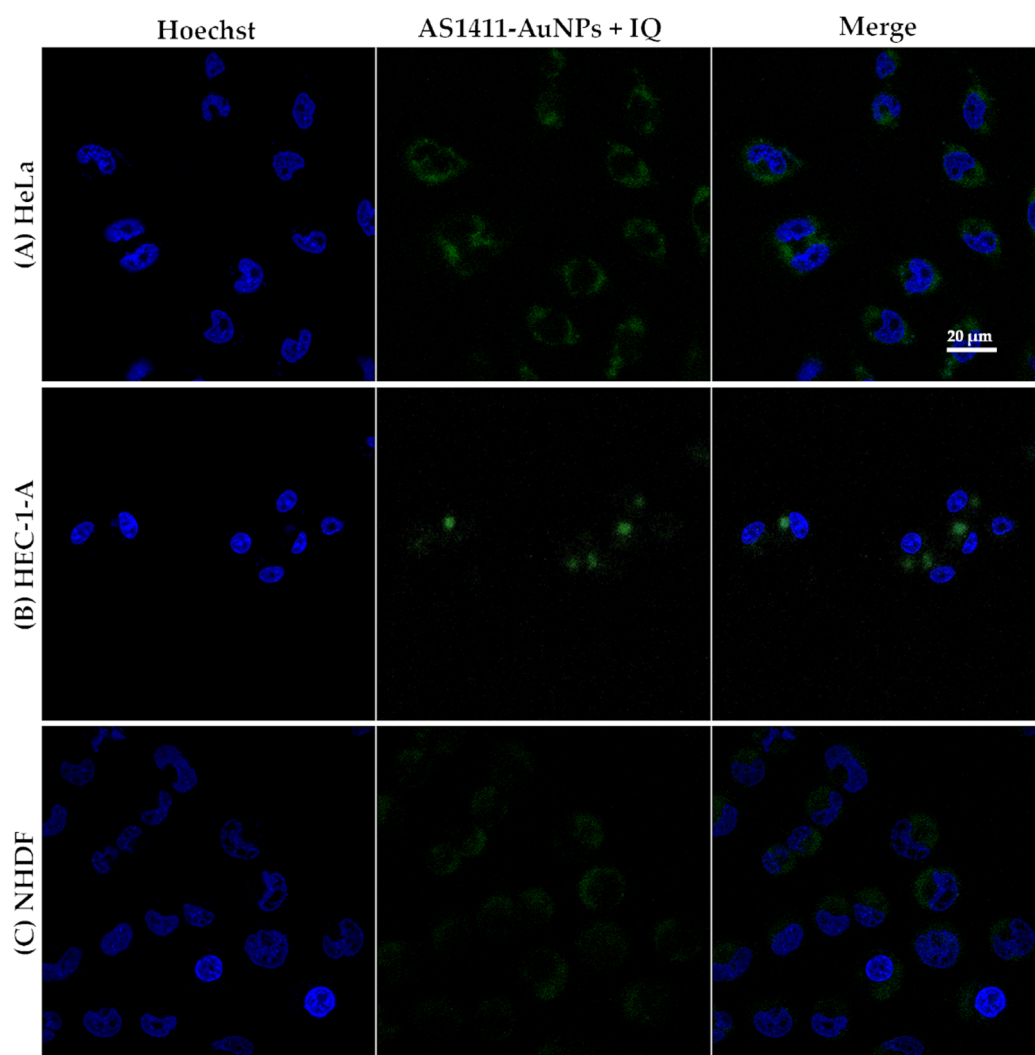

**Figure S7.** Confocal fluorescence images after AS1411-AuNPs with IQ incubation; (A) HeLa, (B) HEC-1-A and (C) NHDF cell lines incubated with AS1411-AuNPs with IQ (green) for 24 h at 37 °C and, then, medium was replaced by new one without treatment. Cell nuclei are stained with Hoechst 33342 (blue). Scale bar: 20 μm.



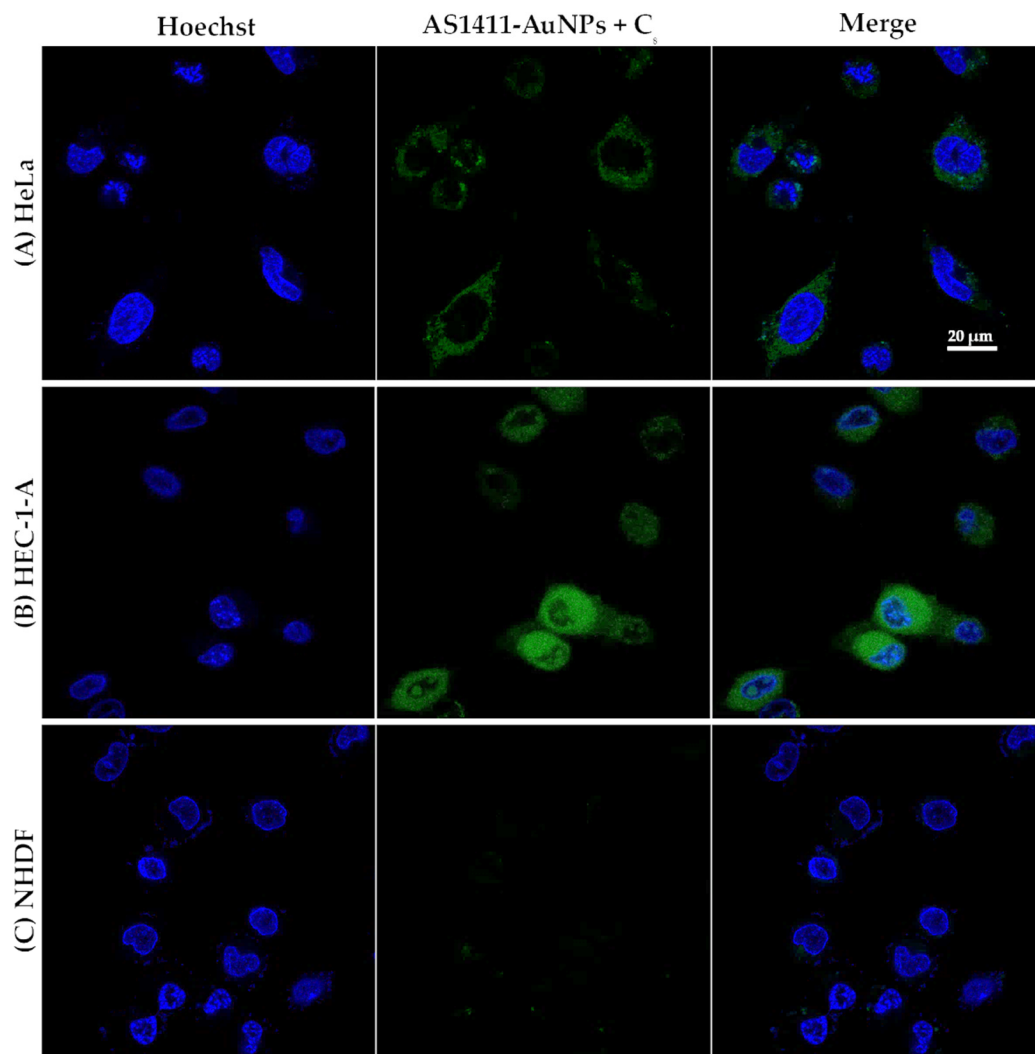

**Figure S8.** Confocal fluorescence images after AS1411-AuNPs with Cs incubation; (A) HeLa, (B) HEC-1-A and (C) NHDF cell lines incubated with AS1411-AuNPs with Cs (green) for 24 h at 37 °C and, then, medium was replaced by new one without treatment. Cell nuclei are stained with Hoechst 33342 (blue). Scale bar: 20  $\mu\text{m}$ .

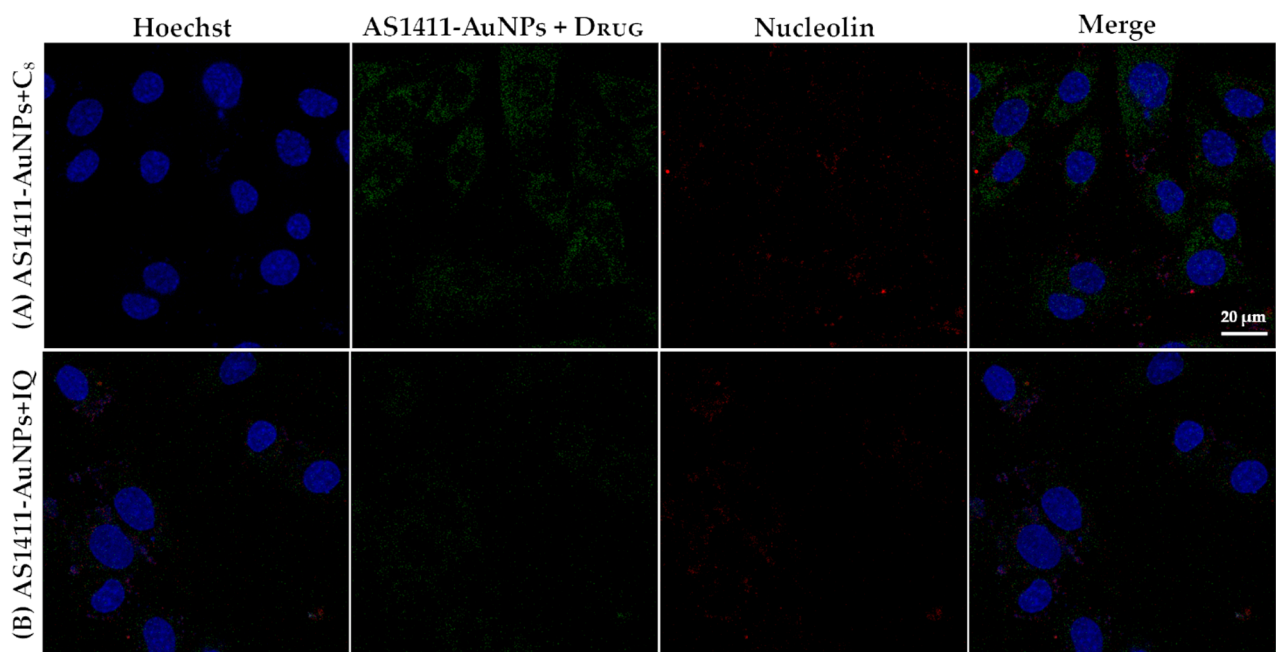

**Figure S9.** Confocal fluorescence images of NHDF cells incubated with (A) AS1411-gold nanoparticles with Cs or (B) AS1411-gold nanoparticles with IQ for 15 min at 37 °C. Nucleolin is stained with AlexaFluor 647® (red), Cs and IQ emits green fluorescence. Cell nuclei are stained with Hoechst 33342 (blue). Scale bar: 20 μm.
